# Supplementary material
Source: PubMed Central journal article supplement (PMC4110914)
Supplement: NIHMS603960-supplement-supplement_1.pdf [file NIHMS603960-supplement-supplement_1.pdf]

## Supplemental data

### Figure 1: Outcome (OS, EFS, RFS) in CIA patients with or without transplant

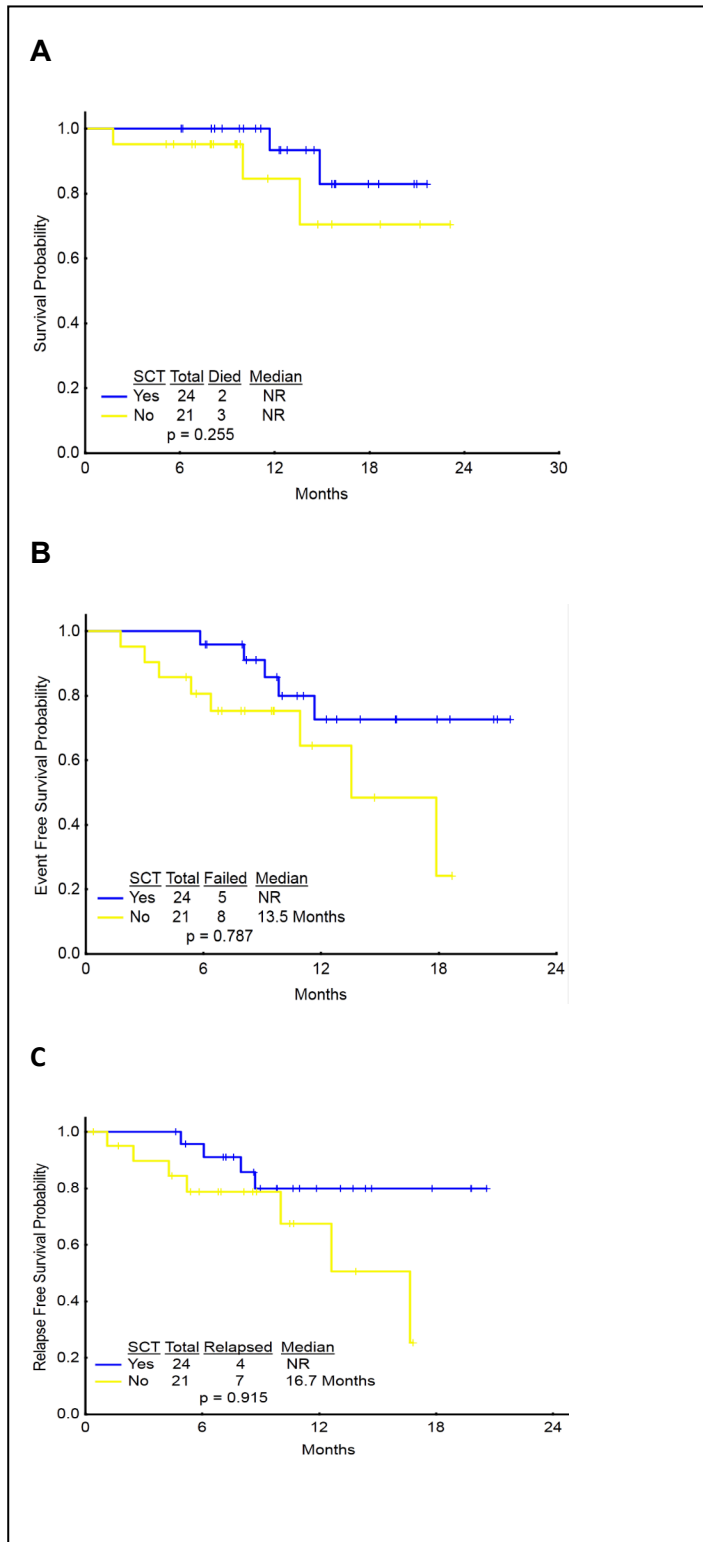

**Table 1. Multivariate Cox's regression for OS**

| <b>Parameter</b>                                          | <b>Hazard Ratio</b> | <b>95% CI</b>      | <b>P value</b>   |
|-----------------------------------------------------------|---------------------|--------------------|------------------|
| <b>CIA vs. IA</b>                                         | <b>0.53</b>         | <b>0.29-0.97</b>   | <b>0.039</b>     |
| <b>Age (<math>\leq 40</math> vs. <math>&gt;40</math>)</b> | <b>0.41</b>         | <b>0.22-0.76</b>   | <b>0.005</b>     |
| <b>Cytogenetic (Intermediate vs. Diploid)</b>             | <b>2.12</b>         | <b>1.15-3.89</b>   | <b>0.016</b>     |
| <b>Cytogenetic (Unfavorable vs. Diploid)</b>              | <b>3.39</b>         | <b>1.95-5.88</b>   | <b>&lt;0.001</b> |
| <b>Platelets</b>                                          | <b>0.99</b>         | <b>0.989-0.998</b> | <b>0.007</b>     |
| <b>Peripheral blood blasts (%)</b>                        | <b>1.01</b>         | <b>1.00-1.02</b>   | <b>0.008</b>     |
| <b>Bone marrow neutrophils (%)</b>                        | <b>1.02</b>         | <b>0.99-1.05</b>   | <b>0.120</b>     |

**Table 2. Multivariate Cox's regression for EFS**

| <b>Parameter</b>                                          | <b>Hazard Ratio</b> | <b>95% CI</b>    | <b>P value</b>   |
|-----------------------------------------------------------|---------------------|------------------|------------------|
| <b>CIA vs. IA</b>                                         | <b>0.40</b>         | <b>0.22-0.73</b> | <b>0.003</b>     |
| <b>Age (<math>\leq 40</math> vs. <math>&gt;40</math>)</b> | <b>0.46</b>         | <b>0.25-0.85</b> | <b>0.014</b>     |
| <b>Cytogenetic (Intermediate vs. Diploid)</b>             | <b>1.74</b>         | <b>0.94-3.21</b> | <b>0.078</b>     |
| <b>Cytogenetic (Unfavorable vs. Diploid)</b>              | <b>3.16</b>         | <b>1.81-5.52</b> | <b>&lt;0.001</b> |
| <b>Platelets</b>                                          | <b>0.99</b>         | <b>0.99-1.00</b> | <b>0.037</b>     |
| <b>Peripheral blood blasts (%)</b>                        | <b>1.01</b>         | <b>1.01-1.02</b> | <b>0.001</b>     |
| <b>Bone marrow neutrophils (%)</b>                        | <b>1.03</b>         | <b>1.00-1.05</b> | <b>0.021</b>     |
